# Supplementary material for: Characterization of Peripheral Immune Cell Subsets in Patients with Acute and Chronic Cerebrovascular Disease: A Case-Control Study
Source: MDPI journal article supplement (doi:10.3390/ijms161025433), 2015-10-23
Supplement: s1 [file s1]

## Supplementary Information

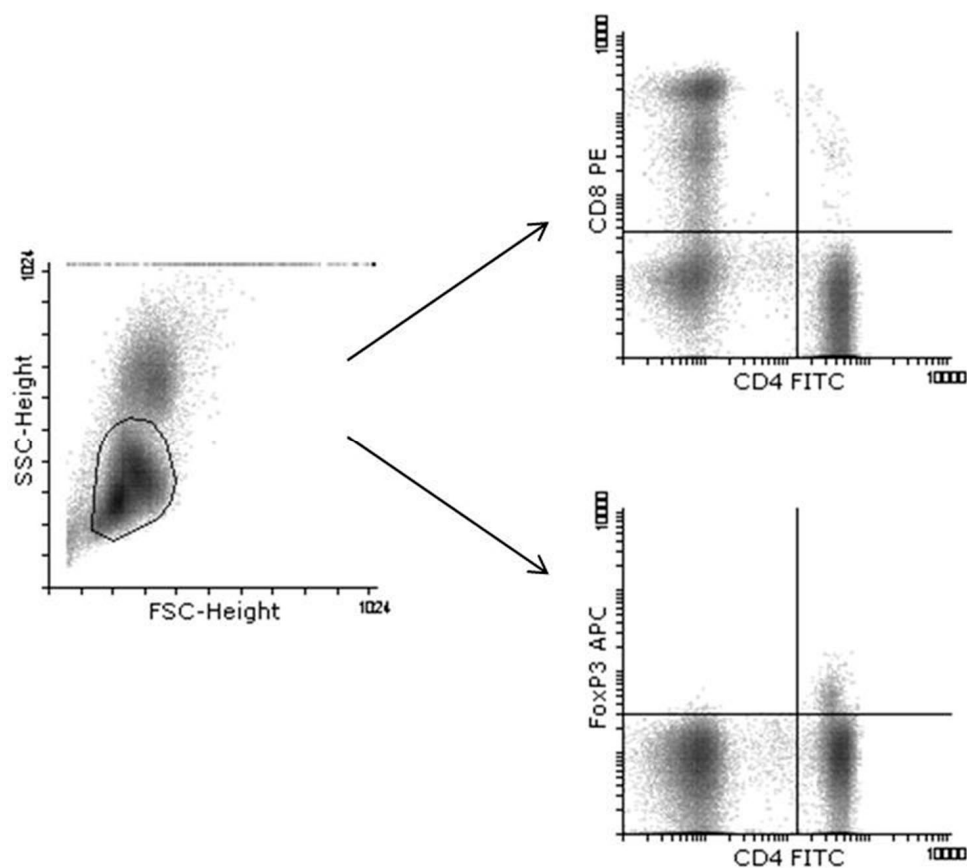

**Figure S1.** Gating strategy for flow cytometric analysis of the fractions of CD4<sup>+</sup>CD8<sup>-</sup>, CD8<sup>+</sup>CD4<sup>-</sup> and CD4<sup>+</sup>FoxP3<sup>+</sup> cells. The surrounded cell population (left graph) indicates the viable lymphocytes. APC, allophycocyanin; PE, phycoerythrin; FITC, fluorescein isothiocyanate; FSC, forward scatter; SSC side scatter.
